# Supplementary material for: Transforming Growth Factor-β1 Induced Epithelial Mesenchymal Transition is blocked by a chemical antagonist of translation factor eIF4E
Source: Sci Rep. 2015 Dec 18;5:18233. doi: 10.1038/srep18233 (PMC4683370; doi:10.1038/srep18233)
Supplement: Supplementary Information [file srep18233-s1.pdf]

## **SUPPLEMENTARY MATERIALS**

**Title: Transforming Growth Factor- $\beta$ 1 Induced Epithelial Mesenchymal Transition is blocked by a chemical antagonist of translation factor eIF4E**

K.A. Smith <sup>1\*</sup>, B. Zhou <sup>2\*</sup>, S. Avdulov <sup>1</sup>, A. Benyumov <sup>1</sup>, M. Peterson <sup>1</sup>, Y. Liu <sup>2</sup>, A. Okon <sup>3</sup>, P.Hergert <sup>1</sup>, J. Braziunas <sup>4</sup>, C. R. Wagner <sup>3</sup>, Z. Borok <sup>2</sup> and P. B. Bitterman <sup>1\*\*</sup>.

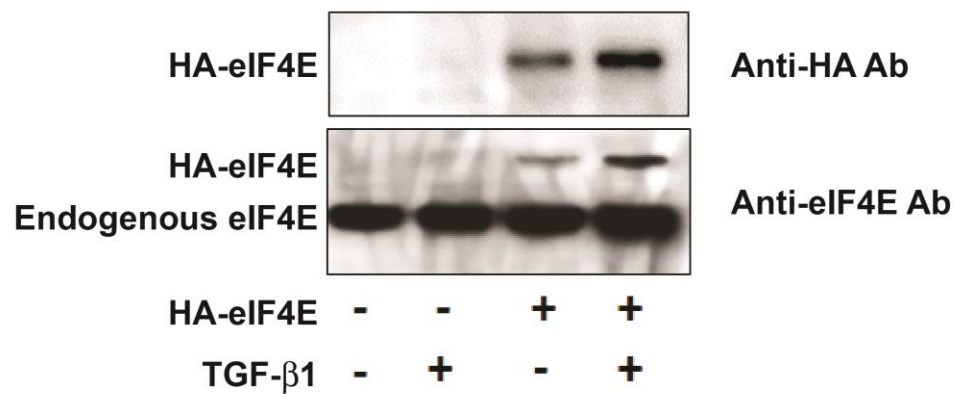

**Supplementary Figure 1. Ectopic overexpression of eIF4E in primary lung epithelial cells.**

AT2 cells were transduced with virus expressing HA-eIF4E (pEF1 $\alpha$ -HA-eIF4E-IRES-GFP) or control (pEF1 $\alpha$ -GFP) and treated the following day with TGF- $\beta$ 1 (2.5 ng/ml) or vehicle (1  $\mu$ l per 1 ml 4 mM HCl containing 1 mg/ml BSA). Cell lysates were harvested after 6 days of TGF- $\beta$ 1 treatment. Western blotting (WB) shows overexpression of HA-eIF4E in virus- transduced samples using both anti-HA-eIF4E and anti-HA antibodies.

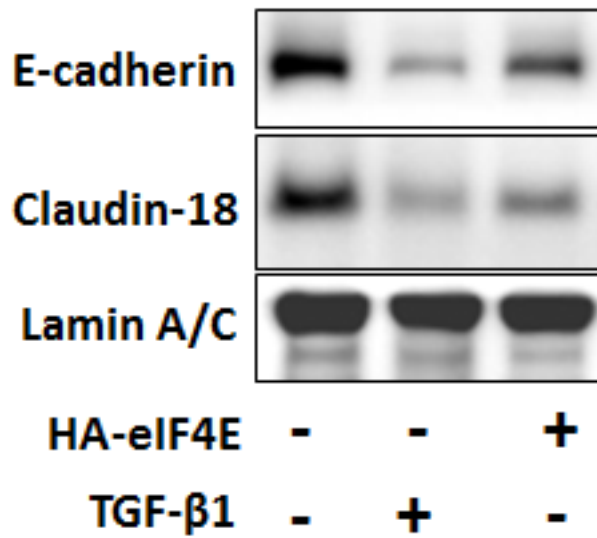

**Supplementary Figure 2.** Primary rat AT2 cells were transduced with virus expressing HA-eIF4E (pEF1 $\alpha$ -HA-IRES-GFP) or control (pEF1 $\alpha$ -GFP) and treated the next day with TGF- $\beta$ 1 (2.5 ng/ml) or vehicle ( 1 $\mu$ l per ml 4 mM HCl containing 1 mg/ml BSA). Cell lysates were harvested after 6 days of TGF- $\beta$ 1 treatment. Shown is an immunoblot probed for E-cadherin and claudin-18. Lamin A/C served as a loading control.

### HA-eIF4E-BP1 (TTAA) overexpression in RLE 6TN cells

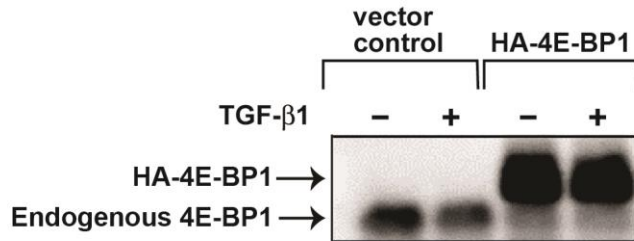

### Supplementary Figure 3. Ectopic overexpression of HA-eIF4E-BP1 (TTAA) in primary lung epithelial cells.

AT2 cells were transduced with virus expressing HA-4E-BP1(TTAA) (pEF1 $\alpha$ -HA-4E-BP1{TTAA}-IRES-GFP) or control (pEF1 $\alpha$ -GFP) and treated the following day with TGF- $\beta$ 1 (2.5 ng/ml) or vehicle (1  $\mu$ l per 1 ml 4 mM HCl containing 1 mg/ml BSA). Cell lysates were harvested after 6 days of TGF- $\beta$ 1 treatment. Western blotting (WB) shows overexpression of HA-4E-BP1 in virus- transduced samples using anti-4E-BP1 antibody.

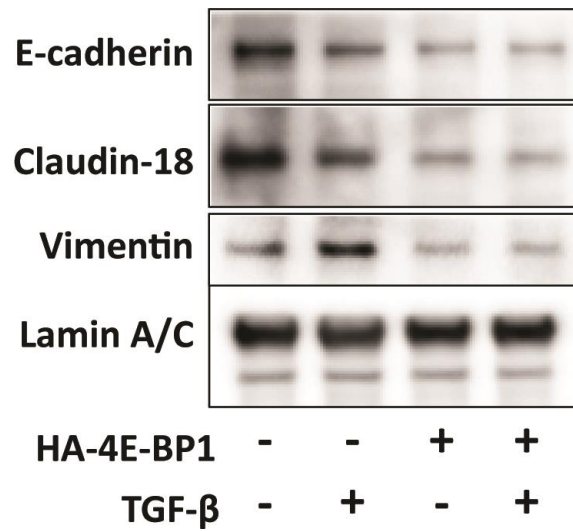

**Supplementary Figure 4.** RLE-6TN cells were transduced with virus expressing a constitutively active form of the translational repressor HA-4E-BP1 (pEF1 $\alpha$ -HA-4E-BP1(TTAA)-IRES-GFP) or control (pEF1 $\alpha$ -GFP). The next day, cells were treated with TGF- $\beta$ 1 (2.5 ng/ml) or vehicle (1  $\mu$ l per 1 ml 4 mM HCl containing 1 mg/ml BSA). Cell lysates were harvested after 2 days of treatment. Shown is an immunoblot probed for E-cadherin, claudin-18, and vimentin. Lamin A/C served as a loading control.

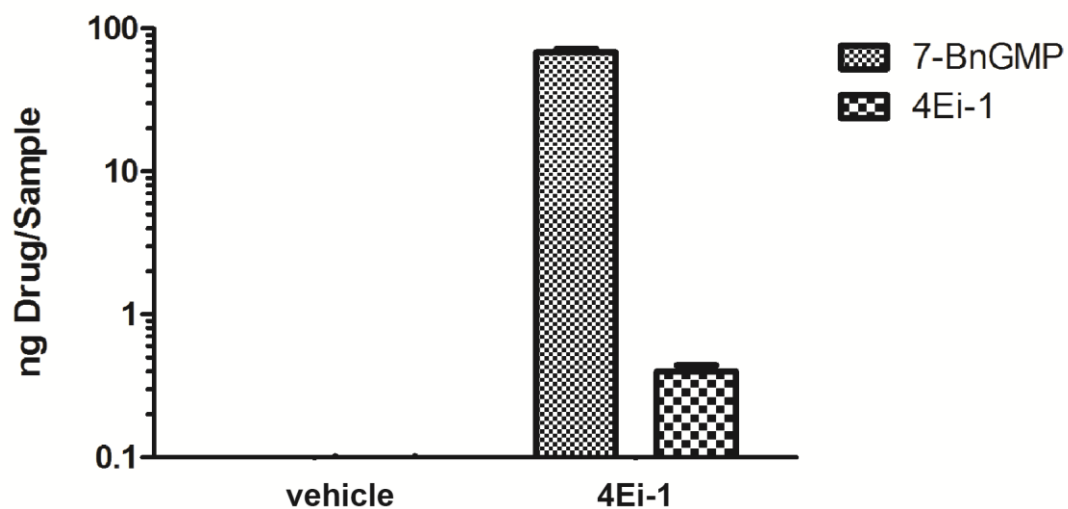

**Supplementary Figure 5. 4Ei-1 is bioactivated to 7-Bn-GMP by RLE6TN cells.** Shown are the amounts of 4Ei-1 (prodrug) and 7-Bn-GMP (active form) within RLE-6TN cells after incubation with 4Ei-1 (500  $\mu$ M in growth medium) for 4 h.

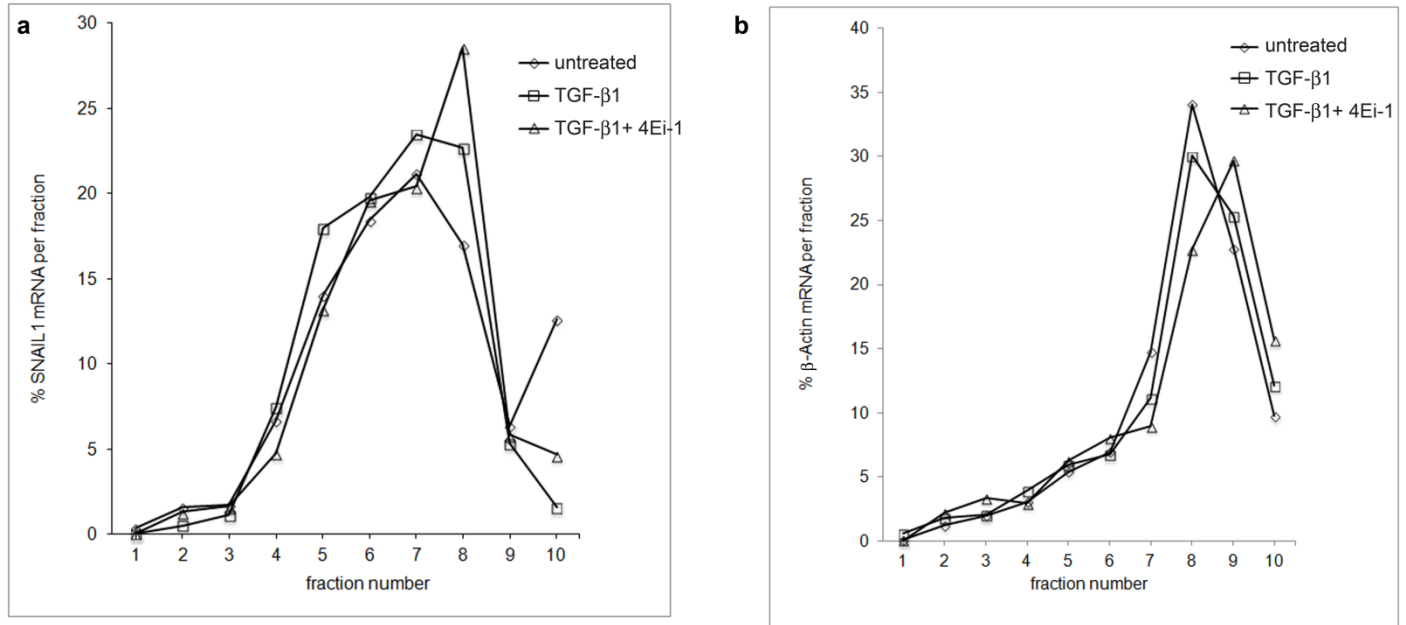

**Supplementary Figure 6. TGF-β1 does not significantly alter the ribosome loading profile of Snail1 or β-actin mRNA.** RLE-6TN cells were treated with TGF-β1 (2.5 ng/ml) for 2h with or without 4Ei-1 (200 μM) pretreatment for 4 h and processed for polysome analysis. **(a)** Shown are values for Snail1 and **(b)** β-actin mRNA abundance in each fraction obtained by qRT-PCR expressed as % mRNA per fraction. Values depicted are the averages of 2 independent sets of experiment. The weighted average fraction values for Snail1 were nearly identical across all 3 conditions: untreated = 6.8, TGF-β = 6.5, TGF-β +4Ei-1 = 6.8; as were the weighted averages for β-actin: 7.7, 7.6, and 7.8 respectively.

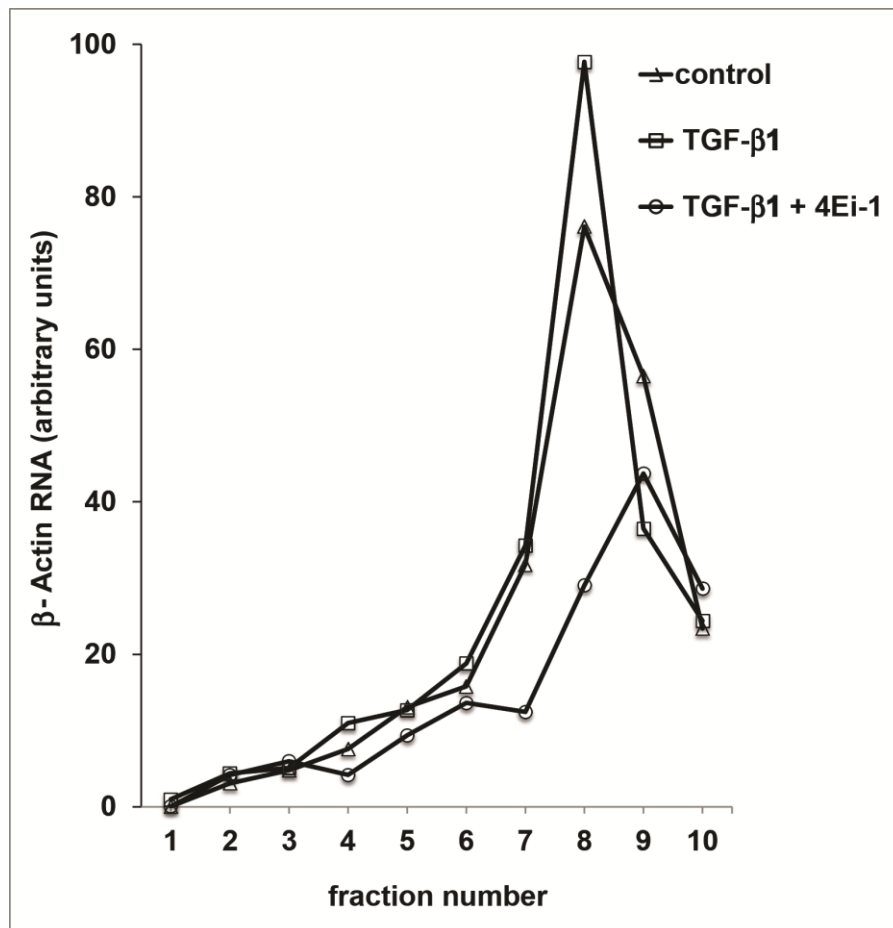

**Supplementary Figure 7. Effect of 4Ei-1 on  $\beta$ -actin mRNA abundance in the polysome pool.** RLE-6TN cells were treated with TGF- $\beta$ 1 (2.5 ng/ml) for 2h with or without 4Ei-1 (200  $\mu$ M) pretreatment for 4 h and processed for polysome bound RNA. Shown are normalized values for  $\beta$ -actin mRNA abundance obtained by qRT-PCR under the indicated conditions across the 10 gradient fractions analyzed.

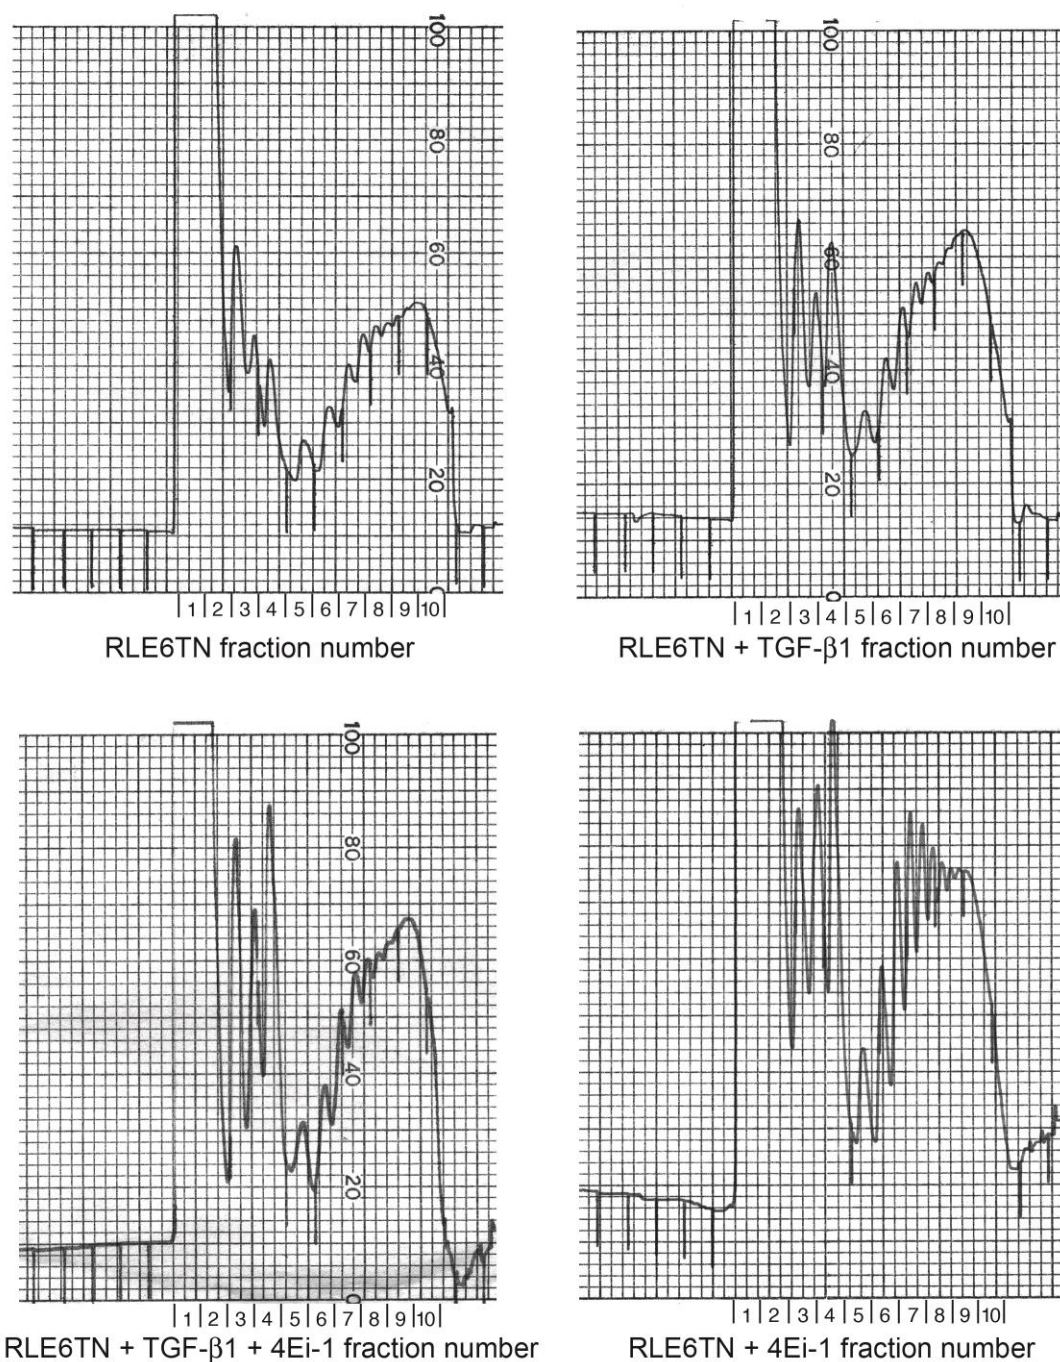

**Supplementary Figure 8. RLE-6TN cell polysome tracings.** Shown are representative polyribosome tracings for RLE-6TN cells from the 4 treatment conditions: no treatment, TGF- $\beta$ 1 (2.5 ng/ml, 2h), 4Ei-1 (200 $\mu$ M, 4 h) or 4Ei-1 (200 $\mu$ M, 4 h) then TGF- $\beta$ 1 (2.5 ng/ml, 2h).
